# Supplementary material
Source: PubMed Central journal article supplement (PMC10527431)
Supplement: NIHMS1908393-supplement-Supplement.pdf [file NIHMS1908393-supplement-Supplement.pdf]

Review article

 Check for updates

---

# Exercise metabolism and adaptation in skeletal muscle

---

In the format provided by the authors and unedited

## **Exercise metabolism and adaptation in skeletal muscle**

Jonathon A.B. Smith<sup>1</sup>, Kevin A. Murach<sup>2</sup>, Kenneth A. Dyar<sup>3,4</sup>, Juleen R. Zierath<sup>1,5,6,#</sup>

<sup>1</sup>Department of Physiology and Pharmacology, Karolinska Institutet, Stockholm, Sweden

<sup>2</sup>Molecular Mass Regulation Laboratory, Exercise Science Research Center, Department of Health, Human Performance and Recreation, University of Arkansas, Fayetteville, Arkansas, USA

<sup>3</sup>Metabolic Physiology, Institute for Diabetes and Cancer, Helmholtz Diabetes Center, Helmholtz Zentrum München, German Research Center for Environmental Health, Neuherberg, Germany

<sup>4</sup>German Center for Diabetes Research (DZD), Neuherberg, Germany

<sup>5</sup>Department of Molecular Medicine and Surgery, Karolinska Institutet, Stockholm, Sweden

<sup>6</sup>Novo Nordisk Foundation Center for Basic Metabolic Research, Faculty of Health and Medical Sciences, University of Copenhagen, Copenhagen, Denmark

#Corresponding author: [juleen.zierath@ki.se](mailto:juleen.zierath@ki.se)

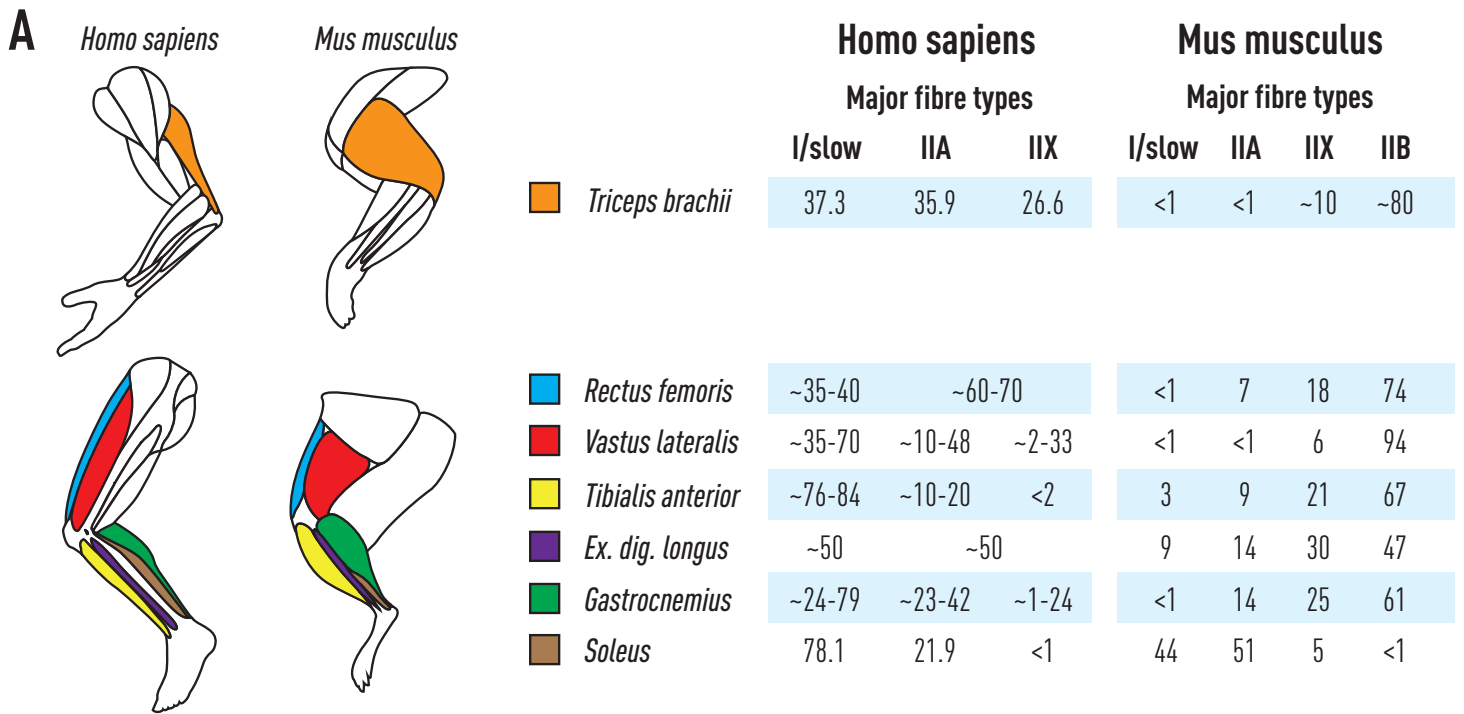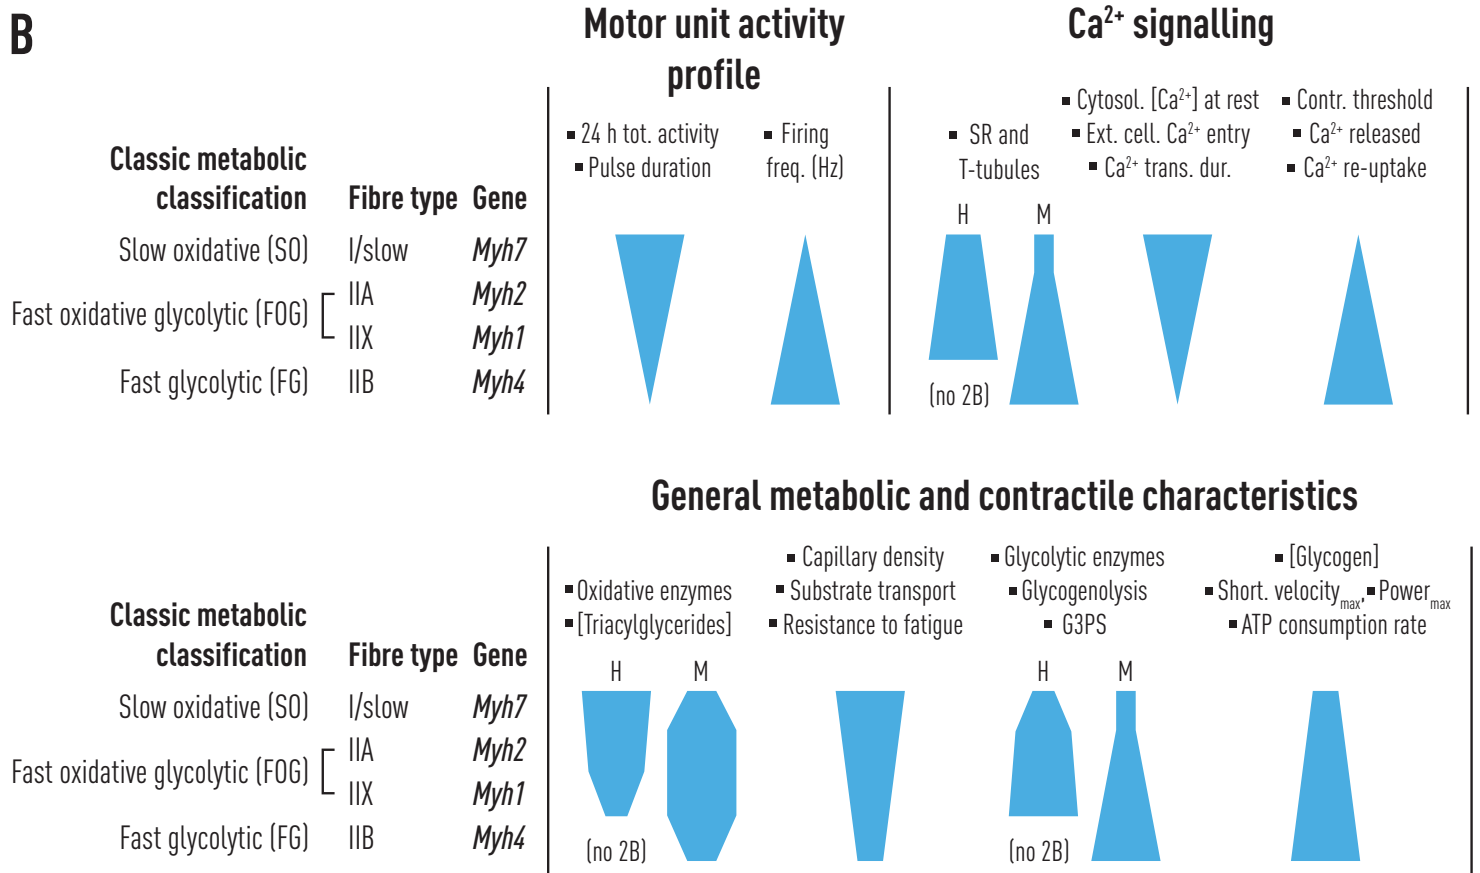

## Supplementary Figure 1: Contractile and metabolic properties of human and rodent skeletal muscle fibres<sup>1-25</sup>.

### (a) Comparative anatomy and fibre type composition of select human and mouse muscles.

The complimentary characteristics of different fibre types support specific muscle function<sup>26</sup>. In humans, postural (also known as tonic) muscles like the soleus contain more type I fibres, whereas phasic muscles (for example, the triceps brachii and lateral head of the rectus femoris) have a greater percentage of type II fibres. Mice and rats are often used to study muscle physiology, however there are important differences between rodent and human muscle. Notably, murine muscle has a higher proportion of type II fibres, and several limb muscles of mice and rats are mostly comprised of fast-glycolytic type IIB fibres (MyHC-IIB, encoded by *Myh4*)<sup>27,28</sup>, which have the greatest peak power of all fibre types<sup>27</sup> but are not expressed in human muscle<sup>27-31</sup>.

### (b) Muscle fibre contractile and metabolic characteristics.

Muscle fibre types are typically classified according to their functional and metabolic properties, which largely reflect differences in upstream  $\alpha$ -motor unit activity, and downstream intracellular calcium-handling and energy-dependent pathways. In human muscle, fast isoforms of myofibrillar and calcium-trafficking proteins are enriched in type II fibres<sup>30,31</sup>, as are regulators of the adenylate kinase<sup>30</sup>, glycogenolysis, and glycolysis-to-lactate production and transport reactions (including the glycerol-3-phosphate shuttle, G3PS)<sup>30,31</sup> to accommodate the  $\geq 2.5$ -4-fold greater activity of fast-myosin ATPases<sup>32</sup>. Alternatively, type I fibres mostly express slower contractile isoforms<sup>30,31</sup> and have lower ATP consumption rates<sup>32</sup> that can be met through oxidative metabolism<sup>33</sup>. Hence, these fibres have denser capillarization<sup>26,34,35</sup>, and higher peroxisomal<sup>31</sup> and mitochondrial contents<sup>36</sup>, including enzymes of  $\beta$ -oxidation<sup>30</sup>, the tricarboxylic acid cycle, and electron transport chain<sup>30,31</sup>. Energy depots also differ accordingly between fast-twitch and slow-twitch fibres. Whereas type II fibres store more creatine phosphate and glycogen<sup>37</sup>, type I fibres have a greater abundance of intramyocellular lipids<sup>36,38</sup> (see main text Box 3). The relatively unique transcriptomes<sup>39</sup>, proteomes<sup>30,31</sup>, and metabolomes<sup>33</sup> of slow-twitch and fast-twitch fibres has enabled the generation of ‘-omics-based signatures, which facilitate deconvolution of approximate type I and type II fibre composition from bulk RNA analysis of human muscle biopsies<sup>40,41</sup>. However, the separation of type IIA and type IIX fibres using such methods is currently not possible<sup>40,41</sup> due to the substantial co-expression of genes<sup>39,42</sup> and proteins<sup>30,43</sup> between type II fibres. Although human and rodent fibres share a similar pattern of slow- to fast-twitch progression from type I to type IIX fibres, human fibres contract slower compared to orthologous mouse and rat fibres<sup>27</sup>. Furthermore, in contrast to human muscle, type IIA fibres are more oxidative than type I in rodents<sup>28,43</sup>.

Panels in Supplementary Fig. 1b that directly compare the properties of human and mouse fibres are labelled with H (human fibres) and M (mouse fibres), respectively. All other panels illustrate differences between fibre types only, not species.

### Abbreviations:

Ex. dig. longus, extensor digitorum longus; SR, sarcoplasmic reticulum; T-tubules, transverse tubules; Ext. cell.  $\text{Ca}^{2+}$  entry, extracellular  $\text{Ca}^{2+}$  entry;  $\text{Ca}^{2+}$  trans. dur.,  $\text{Ca}^{2+}$  transient duration; Contr. threshold, contraction threshold; Short. velocity<sub>max</sub>, maximum shortening velocity.

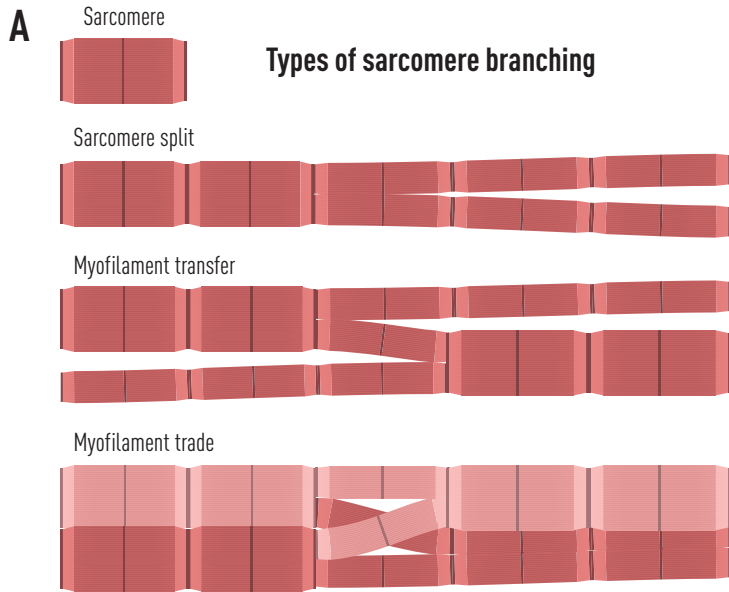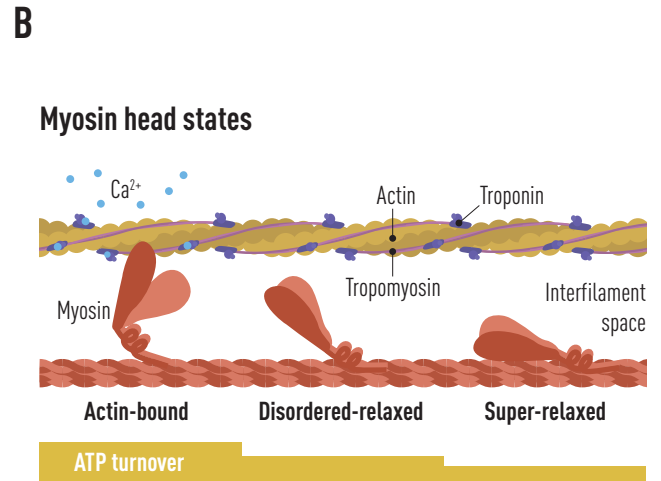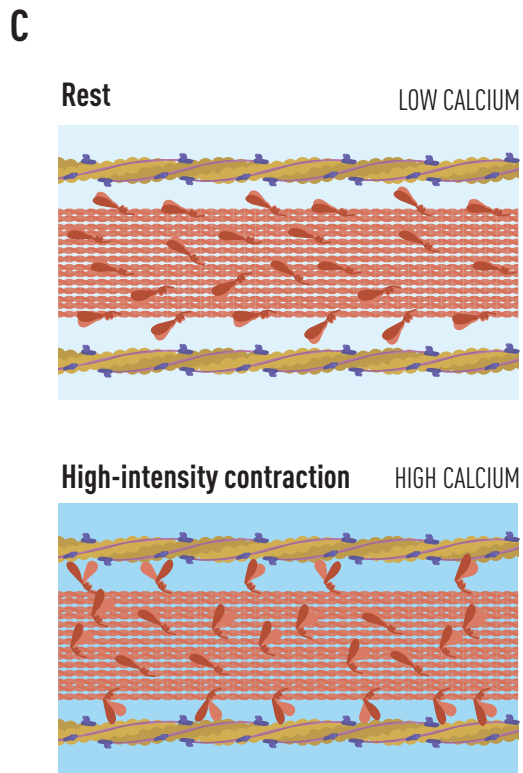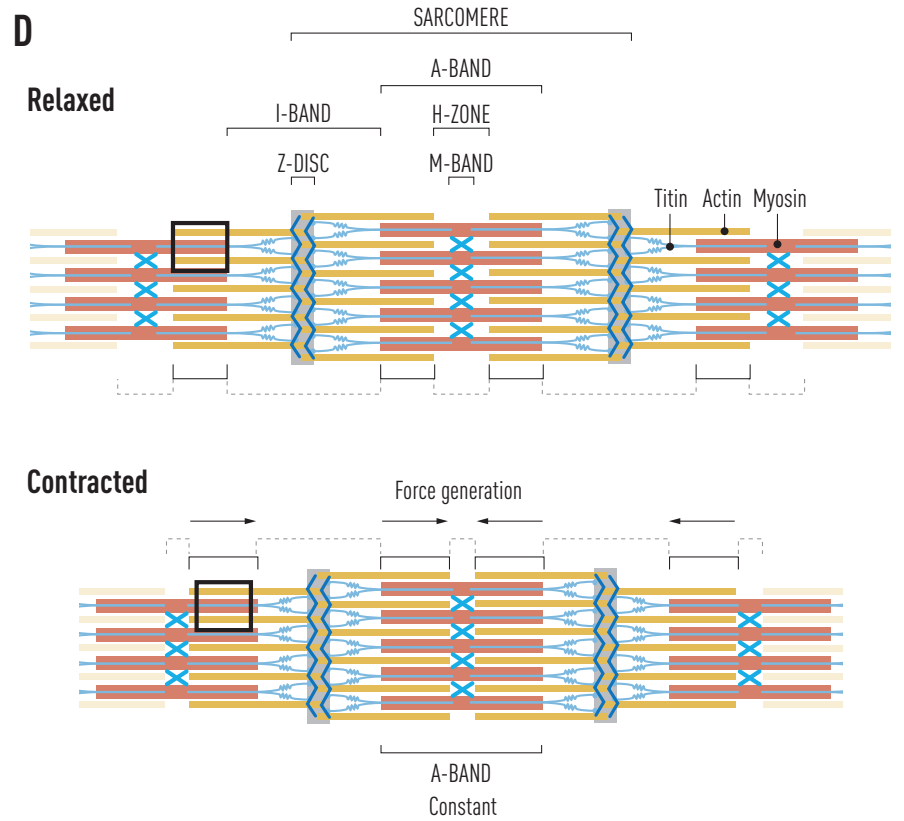

## **Supplementary Figure 2: The myofibrillar matrix and skeletal muscle contraction.**

### **(a) Three types of branching between sarcomeres.**

Myofibrils form a nonlinear matrix of sarcomeres<sup>44-46</sup> connected through three branching subtypes<sup>44</sup>: (1) Sarcomere splitting, where myofilaments from one sarcomere separate into two distinct myofibrils; (2) Myofilament transfer, in which myofilaments from a single sarcomere segregate to join a distinct, adjacent sarcomere; and (3) Myofilament trade, where myofilaments are shared between two neighbouring sarcomeres. Supplementary Fig. 2a is inspired by the focused ion beam-scanning electron microscopy images in ref.<sup>44</sup>.

### **(b) The conformational states of myosin heads.**

Individual sarcomeres contain organised arrangements of parallel thin (actin), thick (myosin), and elastic (titin/connectin) filaments. Under basal conditions, myosin heads are maintained in disordered-relaxed or super-relaxed conformations, with slow to extremely-slow ATP turnover kinetics<sup>47,48</sup> that contribute to the lower relative metabolic rate of muscle at rest<sup>48</sup>. Disordered-relaxed myosin heads protrude into the inter-myofilament space and can readily engage in contraction. However, tropomyosin sterically prevents their association with actin at resting sarcoplasmic calcium ( $\text{Ca}^{2+}$ ) levels. Conversely, myosin binding protein C (ref.<sup>49</sup>), regulatory light chains<sup>48,50</sup>, and essential light chains<sup>50</sup> may act to anchor super-relaxed myosin to the thick filament backbone, away from actin. Super-relaxed myosins could be suppressed further by direct head-to-head contact (that is, the ‘interacting-heads’ motif) that inhibits myosin ATPase<sup>50</sup>. Supplementary Fig. 2b is modified from ref.<sup>51</sup>.

### **(c) Excitation-contraction coupling and myosin activation.**

Upon neuromuscular transmission, action potential propagation along the sarcolemma induces a voltage-dependent alteration of dihydropyridine receptor tetrads in the transverse (T)-tubule, which allosterically opens ryanodine receptor 1 on the sarcoplasmic reticulum to stimulate  $\text{Ca}^{2+}$  release<sup>52</sup>.  $\text{Ca}^{2+}$  binding of troponin exposes sites on actin that permits interaction with the head domain of formerly disordered-relaxed myosin after ATP hydrolysis<sup>53</sup>. This initial step imposes mechanical strain on thick filaments in response to high external load and critically initiates super-relaxed myosin binding with actin<sup>53</sup>. Mechano-stimulation of the thick filament is necessary for maximal force production<sup>53,54</sup> and occurs differently depending on muscle fibre type composition<sup>54</sup>. The gradual step-wise activation of super-relaxed myosin in slow-twitch rat soleus muscle contrasts with the rapid thick filament activation of fast-twitch extensor digitorum longus<sup>54</sup>, but is consistent with the metabolic characteristics of these muscles<sup>28</sup> and the contractile properties of their predominant fibre types<sup>27</sup>.

Panels in (c) correspond to the areas within black boxes on adjacent sarcomeres in (d).

### **(d) The sliding filament model of contraction.**

After strongly binding with actin, myosin undergoes a conformational change, releasing inorganic phosphate and shortening the sarcomeric I-band and H-zone regions to generate force (that is, the ‘power stroke’), while A-band filaments remain relatively constant. The liberation of ADP from myosin post power stroke causes transient rigor until a new ATP molecule enters the myosin head nucleotide-binding pocket. This high-energy myosin-ATP state reduces affinity of myosin for actin and promotes dissociation of the myosin-actin crossbridge. Detached (disordered-relaxed) myosin then hydrolyses bound ATP and is again primed to interact with actin, repeating the cycle (reviewed in ref.<sup>55</sup>).

### Extracellular matrix (ECM)

- A meshwork composed of collagens, glycoproteins, proteoglycans, and elastin
- Embeds muscle fibres
- Critical for muscle force transmission, repair, and exercise adaptation
- Depot for growth factors

### Satellite cell

- Contribute new myonuclei through fusion
- Influence myonuclear transcription
- Promote exercise adaptation through fusion-dependent and independent mechanisms

ECM

Myonucleus

Muscle fibre

- Activate, proliferate and repopulate
- Muscle repair and regeneration

Communicate throughout muscle but mainly to muscle fibres and FAPs to influence ECM remodelling

ECM

### Endothelial cells

- Close proximity to satellite cells
- Exercise-induced angiogenesis
- Enhance the muscle fibre hypertrophic response to resistance exercise

### Immune cells

- Source of secreted growth factors, cytokines, interleukins, etc.
- Balance of pro- to anti-inflammatory macrophages impacts myogenesis
- Facilitate interstitial remodelling

### Fibroadipogenic progenitors (FAPs)

- Can activate satellite cells
- Main contributor to collagen deposition

### Supplementary Figure 3: ‘Supporting’ cell types in skeletal muscle exercise adaptation.

Approximately 40-45% of all cells in human vastus lateralis muscle are interstitial<sup>56</sup> and communication between these mononuclear cell populations, satellite cells, and muscle fibres is essential for muscle integrity, regeneration<sup>57</sup>, and exercise adaptation.

Resident myonuclei have a transcriptional reserve, and can sustain a degree of load-induced hypertrophy<sup>58,59</sup> and cell-autonomous repair<sup>60</sup> in the absence of satellite cells. However, the presence and fusion of satellite cells ultimately appears necessary to maximise muscle mass accrual<sup>58,59,61</sup> and to support functional adaptation, proprioceptive coordination<sup>61</sup>, and overall exercise performance<sup>58,61</sup>. Ribosome biogenesis is greatest within the first four sessions of a 12-bout (three-week) resistance training intervention in humans<sup>62</sup>, and a primary role of satellite cell-incorporation could be the provision of transcripts required for efficient ribosome assembly<sup>58,63</sup> during this time. Indeed, upregulation of translational machinery permits beneficial proteome remodelling with exercise training<sup>64</sup> and ablation of satellite cells results in delayed transcriptomic signatures of ribosome biogenesis, oxidative metabolism, and sarcomeric adaptations in mice<sup>58</sup>.

Mechanical overload transiently increases the content of fibroadipogenic progenitors (FAPs) in muscle<sup>59</sup>, possibly due to an initial chemotaxis of migrating FAPs-like adipose stromal cells from subcutaneous adipose tissue<sup>65</sup>, followed by a wave of resident FAPs proliferation<sup>59,65</sup>. Ligand-receptor interactions are predicted to occur between FAPs and myogenic cells during the earlier stages of muscle differentiation<sup>57</sup>, and the release of thrombospondin 1 (THBS1) by FAPs is at least partially responsible for satellite cell activation upon mechanical loading<sup>59</sup>. Activated satellite cells can signal back to FAPs<sup>66,67</sup>, muscle fibres<sup>68</sup>, and other cells of the microenvironment – including macrophages and endothelial cells<sup>66</sup> – through secreted factors, such as myomiR-206-containing extracellular vesicles<sup>66-68</sup>. This crosstalk helps direct appropriate transcriptional responses in recipient cells<sup>63,66</sup> and facilitates physiological extracellular matrix (ECM) deposition. After hypertrophic exercise training, mouse muscle deficient of satellite cells lacks enrichment for ECM remodelling genes<sup>58</sup> and displays irregular ECM networks<sup>58,67</sup>, with lower proportions of densely-packed collagen<sup>58</sup>. Conversely, most of these maladaptive responses are mitigated when satellite cells are retained for the first 4 (ref.<sup>66</sup>)-7 (ref.<sup>67</sup>) days of an eight-week synergist ablation, indicating a critical early influence of satellite cells independent of their fusion into fibres, which enables future adaptation.

During inflammatory muscle damage, temporal tissue repair appears coordinated between infiltrating immune cells (for example, macrophages) and satellite cells<sup>69,70</sup>. A similar interplay between macrophages and satellite cells might also compliment muscle recovery and adaptation to physical activity. Following acute resistance exercise, macrophages exist along a pro- to anti-inflammatory (M1-to-M2) immunomodulatory spectrum of sub-clusters in human muscle<sup>71</sup>. Conditioned media from M1 and M2 macrophages enhances in vitro myoblast proliferation and differentiation markers, respectively<sup>72</sup>, whereas altering the M1-M2 macrophage balance impairs murine muscle regeneration in vivo, concomitant with excessive collagen accumulation<sup>73</sup>. After downhill running exercise<sup>74</sup>, the production of insulin-like growth factor 1 (IGF1)<sup>75</sup> and tumour necrosis factor- $\alpha$  (TNF- $\alpha$ )<sup>74</sup> by metoerin-like (*Metrnl*)<sup>+</sup> macrophages stimulates satellite cell-mediated repair<sup>75</sup> and FAP apoptosis<sup>74</sup> to aid restoration of muscle morphology<sup>74,75</sup>, function, and ECM integrity<sup>74</sup> in mice. Reciprocally, muscle could signal to macrophages by means of leukaemia inhibitory factor (LIF)<sup>76</sup> and protonated succinate<sup>77</sup> to promote type I collagen turnover<sup>76</sup> and neuromuscular adaptations<sup>77</sup>.

Muscle capillarization is a hallmark of exercise training and a subpopulation of activating transcription factor 3/4 (*Atf3/4*)<sup>+</sup> endothelial cells, enriched near oxidative type I and type IIA



rodent fibres, are largely responsible for exercise-induced angiogenesis in mice<sup>78</sup>. Endothelial cell expansion could be triggered by apelin (APLN) exiting muscle<sup>79</sup> during exercise<sup>80</sup>, and the combined effects of vascular endothelial growth factor (VEGF) and secreted phosphoprotein 1 (SSP1) produced by muscle in a peroxisome proliferator-activated receptor- $\gamma$  coactivator-1 $\alpha$ <sub>1</sub> (PGC-1 $\alpha$ <sub>1</sub>)-dependent manner<sup>81</sup>. Increased vascularisation may augment the hypertrophic response of muscle to resistance training<sup>82</sup>, particularly of type II fibres in older individuals<sup>35,71,83</sup>, through closer association of satellite cells with capillaries<sup>84</sup> and/or endothelial-to-fibre communication based on canonical Notch signalling<sup>85</sup>.

In human vastus lateralis, mesenchymal, endothelial, and myogenic cells are among the most transcriptionally responsive mononuclear populations three hours after acute sprinting exercise<sup>86</sup>. Still, other cells residing in muscle also respond to exercise training in mice<sup>87</sup> (including neural cells, pericytes, smooth muscle cells, and monocytes) and the precise role of these cell types in human exercise adaptation warrants further exploration at single-cell resolution.

## Supplementary boxes

### Supplementary Box 1: Skeletal muscle myogenesis

Myogenesis is the transitional process of muscle differentiation from quiescent progenitors to mature muscle fibres, across the following stages: quiescence (myogenic progenitors) → activation (proliferating myoblasts) → commitment (myocytes, exited cell cycle) → fusion (myotubes) → maturation (muscle fibres). This is orchestrated by a combination of extrinsic cell-to-cell communication<sup>57</sup> (see Supplementary Fig. 3), secreted cues (including growth factors) from the stem cell niche, and an intrinsic transcriptional programme. Integral to the intrinsic programme is the temporal expression of paired box (PAX) transcription factors and myogenic regulatory factors (MRFs), and their cooperation with myocyte enhancer factor 2 (MEF2A, MEF2C, MEF2D), RNA-binding proteins, and non-coding RNAs, among other modifiers (reviewed in ref.<sup>88</sup>).

PAX3 initiates the myogenic programme in embryonic muscle progenitors<sup>89</sup>. However, PAX7 is the key regulator of satellite cell fate in adult muscle. Post-translational methylation<sup>90</sup> and acetylation<sup>91</sup> events activate PAX7-dependent asymmetrical satellite cell divisions, producing more committed (myogenic factor 5-positive, *Myf5*<sup>+</sup>) daughter cells. Upregulation of the muscle-making MRFs *Myf5* and myogenic differentiation 1 (*MyoD1*) is essential for muscle formation<sup>92</sup>. MYF5 and MYOD1 work synergistically but diverge in function<sup>93</sup>. MYF5 acts earlier to specify myogenic lineage by promoting chromatin remodelling around target binding sites for MYOD1 to then robustly activate muscle-specific transcription<sup>93</sup>. MYOD1 also serves as an anchor protein for chromatin loops<sup>94</sup>. The dynamic structural and epigenetic reorganisation of chromatin enables greater three-dimensional promoter-enhancer interaction within regions of myogenic transcription factors (such as myogenin, *Myog*)<sup>95</sup> and myosin heavy chains (MyHC, encoded by *Myh* genes)<sup>96,97</sup>. MYOG is critical for establishing multinucleated fibres through downstream targets myomaker (*Mymk*) and myomixer (*Mymx*)<sup>95</sup>, which govern early and late stages of the membrane fusion reaction, respectively<sup>98</sup>.

Muscle fibre phenotype (see Supplementary Fig. 1b) is ultimately directed by the generally synchronous expression of specific calcium-handling, sarcomeric, and metabolic genes from myonuclei within the same fibre<sup>39</sup>. This is somewhat coordinated by innervation and differences in transcription factor enrichments, chromatin accessibilities<sup>39</sup>, and *Myh* promoter-enhancer interactions<sup>96,97</sup> between fibre types. MYOD1 and MYOG can bind at least two enhancers of *Myh7* (MyHC-I)<sup>97</sup> and could act alongside fast-twitch suppressing microRNAs<sup>99</sup> to facilitate a predominance of slow-twitch apparatus in type I fibres<sup>30,31</sup>. Alternatively, fast-*Myh* expression appears regulated by competitive binding among *Myh1* (MyHC-IIIX), *Myh2* (MyHC-IIA), and *Myh4* (MyHC-IIB) promoters for elements of a 38 (ref.<sup>97</sup>)-42 (ref.<sup>96</sup>) kilobase intergenic super enhancer that maintains a closed conformation in slow-*Myh7*<sup>+</sup> myonuclei<sup>96</sup>. The upstream regulators of fast-*Myh* promoter-super enhancer interactions have yet to be determined, but could include the transcription factor homeobox protein SIX 1 (SIX1)<sup>39,100</sup> and/or the long intergenic noncoding RNA *linc-Myh*<sup>96,100</sup>.

The current understanding of myogenesis is largely derived from animal models and further interrogation of human muscle development and regeneration will be valuable in the pursuit of strategies to improve muscle repair and combat muscle-related diseases.

## Supplementary Box 2: The impact of biological sex on skeletal muscle phenotype and exercise response

Muscle mass distribution, morphology, and composition differs between sexes. Women have ~8% less total muscle than men and carry a greater proportion of that mass in their lower (~60%) versus upper (~40%) body<sup>101</sup>. Type II fibres can be ~17-25% bigger than type I fibres in the vastus lateralis of young adult men<sup>34,102</sup> but are of equivalent size in the corresponding muscle of women<sup>102</sup>. Men have larger motor units and neuromuscular properties may vary between sexes at a given intensity of voluntary contraction<sup>103</sup>. Yet, the pattern of motor unit recruitment is similar when increasing force production<sup>103</sup>. Thus, the greater fatigue-resistance<sup>104</sup> but lower strength<sup>103,105</sup> and power<sup>106</sup> of muscle groups in women might derive mostly from differences in muscle mass<sup>101</sup> and fibre capillary density<sup>105</sup>, proportion<sup>102</sup> and size<sup>71,102,105,107</sup>. The vastus lateralis of women contains ~5-6% more type I fibres<sup>102</sup>, and both type I (~14-32%) and type II (~34-70%) fibres can be markedly smaller than observed in men<sup>71,102,105,107</sup>. However, sex-associated divergence in substrate utilisation<sup>108</sup>, fatigability<sup>104</sup>, and the muscle transcriptome<sup>109</sup> seems to normalize with exercise training.

Most endocrine hormones elicit strong sexual dimorphism (see Supplementary Table 1), and the physiology of premenopausal women could be further influenced by fluctuations of 17 $\beta$ -oestradiol (E2) and progesterone (P4) across the menstrual cycle (reviewed in ref.<sup>110</sup>). A session of moderate-intensity endurance exercise performed in the luteal phase can rely less on carbohydrates and more on fat oxidation compared to the same exercise bout in the follicular phase<sup>111</sup>. Menstrual cycle-related differences in fat oxidation correlate with changes in the 17 $\beta$ -oestradiol-progesterone ratio between phases<sup>112</sup> and may also relate to 17 $\beta$ -oestradiol-oestrogen receptor- $\alpha$  (ER $\alpha$ ) signalling in liver<sup>113</sup>. This 17 $\beta$ -oestradiol-ER $\alpha$  axis was shown to suppress hepatic gluconeogenesis in mice through a serine/threonine protein kinase (AKT)-forkhead box protein O1 (FOXO1)-dependent mechanism<sup>113</sup>, which could contribute towards lower rates of plasma glucose appearance during submaximal exercise in the mid-luteal phase<sup>110</sup>. However, any mild effects of the menstrual cycle on moderate-intensity exercise metabolism are likely surpassed by the metabolic demands of more strenuous physical activity (see main text section 'Acute exercise metabolism in skeletal muscle' and Fig. 2). Indeed, intramuscular glycogen depletion, blood lactate, and serum non-esterified fatty acid (NEFA) responses to high-intensity interval exercise were mostly similar between menstrual cycle phases<sup>114</sup>.

Periodizing resistance exercise so that greater training volumes are performed in the follicular (as opposed to luteal) phase might improve strength and hypertrophy outcomes<sup>115-117</sup>. The underlying mechanisms are unclear but follicular phase training coincides with higher muscle ER $\alpha$  protein abundance<sup>118</sup> and potentiation of 17 $\beta$ -oestradiol-ER $\alpha$  signalling in satellite cells<sup>119</sup> could augment myonuclear accretion to a follicular phase resistance training intervention<sup>117</sup>. Still, there is substantial interindividual variation in both reported menstrual cycle-associated symptoms<sup>120</sup> and adaptations to menstrual phase-periodized training<sup>115</sup>. Thus, further investigation is required before general, evidence-based recommendations in this area can be made. In the meantime, individuals should take a personalized approach to exercise training according to self-perceived readiness for physical activity. Importantly for women using monophasic second-generation oral contraceptives, these do not appear to negatively impact gains in muscle mass or strength following 12 weeks (36 sessions) of resistance exercise<sup>121</sup>.

## Supplementary tables

### Supplementary Table 1: Key exercise-responsive hormones

| Hormone                                                                                        | Effect on skeletal muscle                                                                                                                                                                                                                                                                                                                                                                                                                             | Impact of exercise                                                                                                                                                                                                                                                                                                                                             | Circadian differences                                                                                                                                                             | Biological sex differences                                                                                                                                                                   | Ageing                                                                                                                                                                            |
|------------------------------------------------------------------------------------------------|-------------------------------------------------------------------------------------------------------------------------------------------------------------------------------------------------------------------------------------------------------------------------------------------------------------------------------------------------------------------------------------------------------------------------------------------------------|----------------------------------------------------------------------------------------------------------------------------------------------------------------------------------------------------------------------------------------------------------------------------------------------------------------------------------------------------------------|-----------------------------------------------------------------------------------------------------------------------------------------------------------------------------------|----------------------------------------------------------------------------------------------------------------------------------------------------------------------------------------------|-----------------------------------------------------------------------------------------------------------------------------------------------------------------------------------|
| <b>Growth hormone (GH)</b><br><small>122-128</small>                                           | <ul style="list-style-type: none"> <li>● Anabolic (hyperplasia and hypertrophy; stimulates muscle protein synthesis ~66%)</li> <li>● Stimulates systemic (mainly hepatic) and skeletal muscle production of IGF1</li> <li>● Promotes lipid oxidation and mitochondrial biogenesis</li> <li>● Increases muscle blood flow</li> <li>● GH-deficient adults show reduced muscle mass, impaired exercise capacity, and increased adipose tissue</li> </ul> | <ul style="list-style-type: none"> <li>● Induced by aerobic and resistance exercise; acute transient increase according to relative intensity</li> <li>● Peaks ~30 min after start of exercise, with return to baseline after ~1 h</li> <li>● Exercise-induced increase retained if rest is <math>\geq 3</math> h between subsequent training bouts</li> </ul> | <ul style="list-style-type: none"> <li>● Pulsatile; major peak at night associated with first slow-wave sleep episode; lowest levels observed during the day</li> </ul>           | <ul style="list-style-type: none"> <li>● Mean levels ~2-fold greater in women than men</li> </ul>                                                                                            | <ul style="list-style-type: none"> <li>● Mean levels decrease with age, ~14% per decade after ~40 years of age</li> <li>● Exercise-induced release reduces with age</li> </ul>    |
| <b>Insulin-like growth factor-1 (IGF1)</b><br><small>124,128,129</small>                       | <ul style="list-style-type: none"> <li>● Anabolic (hyperplasia and hypertrophy; stimulates muscle protein synthesis ~70%)</li> <li>● Anticatabolic (inhibits muscle protein breakdown ~40%)</li> <li>● Increases muscle blood flow</li> </ul>                                                                                                                                                                                                         | <ul style="list-style-type: none"> <li>● Acute and transient increase of muscle-derived IGF1 isoforms after resistance and endurance exercise</li> </ul>                                                                                                                                                                                                       | <ul style="list-style-type: none"> <li>● Relatively stable</li> </ul>                                                                                                             | <ul style="list-style-type: none"> <li>● Similar levels in women and men</li> </ul>                                                                                                          | <ul style="list-style-type: none"> <li>● Mean levels decrease with age</li> </ul>                                                                                                 |
| <b>Glucocorticoids</b><br><small>128,130-141</small><br><br>Mainly cortisol and corticosterone | <ul style="list-style-type: none"> <li>● Catabolic (increases muscle protein breakdown)</li> <li>● Transcriptional regulation of ubiquitin-proteasome and</li> </ul>                                                                                                                                                                                                                                                                                  | <ul style="list-style-type: none"> <li>● Increased at higher exercise intensities (<math>\geq 60\% \dot{V}O_{2max}</math>)</li> <li>● Circulating levels return to baseline within ~1-3 h post exercise</li> </ul>                                                                                                                                             | <ul style="list-style-type: none"> <li>● Blood levels lowest around midnight (~50 nmol l<sup>-1</sup>) and highest during the early-morning (~500 nmol l<sup>-1</sup>)</li> </ul> | <ul style="list-style-type: none"> <li>● Conflicting literature. In general, there appears to be no major differences between women and men. Heterogeneity in results may reflect</li> </ul> | <ul style="list-style-type: none"> <li>● Equivocal reports, possibly for same reasons as stated for biological sex differences</li> <li>● Progressive increase in mean</li> </ul> |

|                                                                                  |                                                                                                                                                                                                                                                                                                                                                                                                                                            |                                                                                                                                                                                                                                                                                                                                                                                                                                                                                                                                                                                                                                                                                                                          |                                                                                                                                                                                                                                                                                                                                                                                                                                                                                                                                                                                                                                                                                                   |                                                                                                                                         |                                                                                                                                                                      |
|----------------------------------------------------------------------------------|--------------------------------------------------------------------------------------------------------------------------------------------------------------------------------------------------------------------------------------------------------------------------------------------------------------------------------------------------------------------------------------------------------------------------------------------|--------------------------------------------------------------------------------------------------------------------------------------------------------------------------------------------------------------------------------------------------------------------------------------------------------------------------------------------------------------------------------------------------------------------------------------------------------------------------------------------------------------------------------------------------------------------------------------------------------------------------------------------------------------------------------------------------------------------------|---------------------------------------------------------------------------------------------------------------------------------------------------------------------------------------------------------------------------------------------------------------------------------------------------------------------------------------------------------------------------------------------------------------------------------------------------------------------------------------------------------------------------------------------------------------------------------------------------------------------------------------------------------------------------------------------------|-----------------------------------------------------------------------------------------------------------------------------------------|----------------------------------------------------------------------------------------------------------------------------------------------------------------------|
|                                                                                  | <p>autophagy-lysosome system components via ligand-activated glucocorticoid receptors</p> <ul style="list-style-type: none"> <li>● Can directly synchronize skeletal muscle circadian clocks through glucocorticoid response elements (GREs) in regulatory regions of several clock genes</li> </ul>                                                                                                                                       |                                                                                                                                                                                                                                                                                                                                                                                                                                                                                                                                                                                                                                                                                                                          |                                                                                                                                                                                                                                                                                                                                                                                                                                                                                                                                                                                                                                                                                                   | <p>confounders related to sleep schedules, body composition, nutrition, psychological stress, etc.</p>                                  | <p>24-h levels in both women and men from ~20-80 years of age</p>                                                                                                    |
| <p><b>Catecholamines</b><br/>131,142-146</p> <p>Adrenaline and noradrenaline</p> | <ul style="list-style-type: none"> <li>● Anticatabolic (inhibits muscle protein breakdown ~20%)</li> <li>● Catabolic (stimulates glycogenolysis and lipolysis)</li> <li>● Mobilization of glycogen and triacylglyceride energy stores producing lactate, glycerol, and non-esterified fatty acids (NEFA)</li> <li>● Increases substrate oxidation and thermogenesis</li> <li>● Increases muscle blood flow</li> <li>● Inotropic</li> </ul> | <ul style="list-style-type: none"> <li>● During exercise, plasma adrenaline and noradrenaline can increase ~10-times baseline levels depending on intensity and duration</li> <li>● After exercise, return to baseline occurs within minutes due to short half-life and reuptake mechanisms</li> <li>● Adrenaline clearance increases ~15% during moderate exercise and decreases ~22% below baseline levels during intense exercise</li> <li>● Noradrenaline increase is enhanced if heat receptors are stimulated</li> <li>● Both noradrenaline and adrenaline responses are augmented if cold receptors are stimulated</li> <li>● Exercise response greater in the upright, as opposed to supine, position</li> </ul> | <ul style="list-style-type: none"> <li>● Adrenaline and noradrenaline show diurnal rhythms, even under supine conditions, with increased levels during the active phase (day), and reduced levels during the rest phase (night).</li> <li>● Sleep and posture both have direct effects on noradrenaline levels</li> <li>● 24-h noradrenaline levels oscillate between ~150-350 <math>\mu\text{g ml}^{-1}</math> under constant recumbent conditions, and up to ~600 <math>\mu\text{g ml}^{-1}</math> under ambulatory conditions</li> <li>● 24-h adrenaline levels oscillate from ~20-50 <math>\mu\text{g ml}^{-1}</math> and are not significantly affected by posture or sleep stage</li> </ul> | <ul style="list-style-type: none"> <li>● Most studies have reported no sex differences in catecholamine response to exercise</li> </ul> | <ul style="list-style-type: none"> <li>● Adrenaline levels are similar between young and elderly adults</li> <li>● Noradrenaline levels increase with age</li> </ul> |

|                                                                                                                                                    |                                                                                                                                                                                                                                                                                                                                                                                                                                                                                                 |                                                                                                                                                                                                                                                                                                                                                                                                                                    |                                                                                                                                                                                                                                                                                                                      |                                                                                                                                                                                                                            |                                                                                                                                                                                                                                                                                                                                                                                                                         |
|----------------------------------------------------------------------------------------------------------------------------------------------------|-------------------------------------------------------------------------------------------------------------------------------------------------------------------------------------------------------------------------------------------------------------------------------------------------------------------------------------------------------------------------------------------------------------------------------------------------------------------------------------------------|------------------------------------------------------------------------------------------------------------------------------------------------------------------------------------------------------------------------------------------------------------------------------------------------------------------------------------------------------------------------------------------------------------------------------------|----------------------------------------------------------------------------------------------------------------------------------------------------------------------------------------------------------------------------------------------------------------------------------------------------------------------|----------------------------------------------------------------------------------------------------------------------------------------------------------------------------------------------------------------------------|-------------------------------------------------------------------------------------------------------------------------------------------------------------------------------------------------------------------------------------------------------------------------------------------------------------------------------------------------------------------------------------------------------------------------|
|                                                                                                                                                    |                                                                                                                                                                                                                                                                                                                                                                                                                                                                                                 | <ul style="list-style-type: none"> <li>●Exercise response is potentiated in states of insulin deficiency (e.g., fasting, high fat diet, poorly-controlled diabetes)</li> <li>●Exercise response is reduced in individuals with obesity who have increased insulin secretion</li> <li>●Long-term physical training increases the size and secretory capacity of the adrenal medulla, which may improve exercise capacity</li> </ul> |                                                                                                                                                                                                                                                                                                                      |                                                                                                                                                                                                                            |                                                                                                                                                                                                                                                                                                                                                                                                                         |
| <p><b><u>Thyroid hormones</u></b> <sup>147-151</sup></p> <p>Thyrotropin (TSH), thyroxine (T<sub>4</sub>), and triiodothyronine (T<sub>3</sub>)</p> | <ul style="list-style-type: none"> <li>●Transcriptional regulation of muscle fibre type and metabolic profile by ligand-activated thyroid hormone receptors (e.g., repression of <i>MYH7</i> and stimulation of <i>SERCA1</i>, <i>PPARGC1A</i>, and <i>GLUT4</i>)</li> <li>●Potentiates the effects of catecholamines</li> <li>●Promotes mitochondrial biogenesis</li> <li>●Increases rates of contraction and relaxation</li> <li>●Increases energy consumption and heat production</li> </ul> | <ul style="list-style-type: none"> <li>●Literature is inconsistent, or contradictory (see summary on table 4 of ref. <sup>149</sup>)</li> <li>●Overall, baseline thyroid hormone levels do not appear to be affected by chronic endurance exercise</li> <li>●Exercise tolerance and performance are reduced in patients with subclinical hypothyroidism</li> </ul>                                                                 | <ul style="list-style-type: none"> <li>●TSH oscillates ~2-fold; highest at night and lowest during the day</li> <li>●Circulating levels of free T<sub>4</sub> are fairly stable.</li> <li>●Circulating levels of free T<sub>3</sub> oscillate with low amplitude and follow TSH rhythm with ~90-min delay</li> </ul> | <ul style="list-style-type: none"> <li>●No major differences in TSH between men and women prior to menopause</li> <li>●Free T<sub>4</sub> and T<sub>3</sub> blood concentrations lower in women compared to men</li> </ul> | <ul style="list-style-type: none"> <li>●Increased prevalence of subclinical thyroid disease with age</li> <li>●Reduced TSH secretion during healthy ageing</li> <li>●Blunted peak of circadian TSH, with ~1-1.5-h phase advance</li> <li>●TSH is higher in women post-menopause versus men</li> <li>●Total and free T<sub>4</sub> unchanged with age</li> <li>●Reduced total and free T<sub>3</sub> with age</li> </ul> |
| <p><b><u>Androgens</u></b> <sup>152-159</sup></p>                                                                                                  | <ul style="list-style-type: none"> <li>●Anabolic (concentration-dependent increase)</li> </ul>                                                                                                                                                                                                                                                                                                                                                                                                  | <ul style="list-style-type: none"> <li>●Short, intense exercise (e.g., sprint or resistance modalities)</li> </ul>                                                                                                                                                                                                                                                                                                                 | <ul style="list-style-type: none"> <li>●Testosterone and DHT levels oscillate ~10-20% over 24 h, with</li> </ul>                                                                                                                                                                                                     | <ul style="list-style-type: none"> <li>●Levels are ~20-times higher in men than in</li> </ul>                                                                                                                              | <ul style="list-style-type: none"> <li>●In men, mean testosterone levels peak at ~20 years of age</li> </ul>                                                                                                                                                                                                                                                                                                            |

|                                                                                                                 |                                                                                                                                                                                                                                                                                                                                                                                                                                                                                                                  |                                                                                                                                                                                                                                                                                                                                                         |                                                                                                                                                                         |                                                                                                                 |                                                                                                                                                                                                                                                                                                                                                                        |
|-----------------------------------------------------------------------------------------------------------------|------------------------------------------------------------------------------------------------------------------------------------------------------------------------------------------------------------------------------------------------------------------------------------------------------------------------------------------------------------------------------------------------------------------------------------------------------------------------------------------------------------------|---------------------------------------------------------------------------------------------------------------------------------------------------------------------------------------------------------------------------------------------------------------------------------------------------------------------------------------------------------|-------------------------------------------------------------------------------------------------------------------------------------------------------------------------|-----------------------------------------------------------------------------------------------------------------|------------------------------------------------------------------------------------------------------------------------------------------------------------------------------------------------------------------------------------------------------------------------------------------------------------------------------------------------------------------------|
| <p>Mainly testosterone and 5<math>\alpha</math>-dihydrotestosterone (DHT)</p>                                   | <p>in satellite cell number, myonuclear accretion, and muscle protein synthesis)</p> <ul style="list-style-type: none"> <li>●Increases strength</li> <li>●Transcriptional regulation mediated by ligand-activated androgen receptor</li> </ul>                                                                                                                                                                                                                                                                   | <p>transiently increase testosterone (for ~30 min)</p> <ul style="list-style-type: none"> <li>●Testosterone response increases in an intensity-dependent manner</li> <li>●Exercise-induced increases are greater in younger compared to older men</li> <li>●Prolonged submaximal exercise (e.g., endurance-type) reduces testosterone levels</li> </ul> | <p>peak levels in the morning and trough levels in the evening</p>                                                                                                      | <p>women or children</p>                                                                                        | <p>and modestly decline until ~80 years of age, with slightly faster decline thereafter</p> <ul style="list-style-type: none"> <li>●Reduced 24-h rhythm of serum testosterone in healthy, elderly men</li> <li>●In women, mean testosterone levels peak in late adolescence, decline gradually over the next two decades, and then remain relatively stable</li> </ul> |
| <p><b>Oestrogens</b><sup>160-164</sup></p> <p>Mainly 17<math>\beta</math>-oestradiol (E2) and oestrone (E1)</p> | <ul style="list-style-type: none"> <li>●Transcriptional regulation via ligand-activated oestrogen receptors</li> <li>●Inhibits GH-dependent hepatic production of IGF1</li> <li>●Promotes mitochondrial function and protects against oxidative stress</li> <li>●Promotes insulin sensitivity</li> <li>●Chronically reduced levels in postmenopausal women are associated with blunted response to anabolic stimuli; response is restored to premenopausal levels under oestrogen replacement therapy</li> </ul> | <ul style="list-style-type: none"> <li>●In postmenopausal monozygotic twins, hormone replacement therapy increased maximum walking speed, vertical jump height, and thigh muscle cross-sectional area relative to the untreated twin</li> </ul>                                                                                                         | <ul style="list-style-type: none"> <li>●24-h E2 rhythm peaks at night during follicular phase; 24-h rhythm absent during luteal phase in premenopausal women</li> </ul> | <ul style="list-style-type: none"> <li>●Levels are ~4-times higher in premenopausal women versus men</li> </ul> | <ul style="list-style-type: none"> <li>●In women, mean oestrogen levels peak at ~16 years of age and remain relatively constant up to ~40 years of age</li> <li>●Levels remain chronically decreased in postmenopausal women</li> <li>●In men, mean oestrogen levels peak at ~20 years of age and remain relatively stable thereafter</li> </ul>                       |

*GLUT4*, glucose transporter 4 mRNA; *MYH7*, myosin heavy chain 7 (MyHC-I) mRNA; *PPARGC1A*, peroxisome proliferator-activated receptor- $\gamma$  coactivator-1 $\alpha$  (*PGC1 $\alpha$* ) mRNA; *SERCA1*, mRNA of the fast-twitch sarco/endoplasmic reticulum Ca<sup>2+</sup>-ATPase isoform.

**Supplementary Table 2: Notable studies of the human skeletal muscle transcriptomic response to exercise**

| <b>Focus &amp; Study</b>                                                               | <b>Participant Population</b>                                                              | <b>Design</b>                                                                                                                                                                                          | <b>Main Findings</b>                                                                                                                                                                                                                                                                                                                                                                      |
|----------------------------------------------------------------------------------------|--------------------------------------------------------------------------------------------|--------------------------------------------------------------------------------------------------------------------------------------------------------------------------------------------------------|-------------------------------------------------------------------------------------------------------------------------------------------------------------------------------------------------------------------------------------------------------------------------------------------------------------------------------------------------------------------------------------------|
| <b><u>Acute</u></b>                                                                    |                                                                                            |                                                                                                                                                                                                        |                                                                                                                                                                                                                                                                                                                                                                                           |
| Endurance:<br>Mahoney et al.,<br>2005 <sup>165</sup>                                   | Healthy young men (n=14 total, n=4 for microarray)                                         | VL biopsy 1-2 weeks pre, then 3 h, and 48 h following 75 min of high-intensity cycling                                                                                                                 | <ul style="list-style-type: none"> <li>• Larger gene response at 3 h with several persistent or differential changes at 48 h</li> <li>• Regulation of mitochondrial, metabolic, oxidative stress, and ion transporter genes</li> </ul>                                                                                                                                                    |
| Resistance:<br>Zamboni et al.,<br>2003 <sup>166</sup>                                  | Healthy men aged 31-51 years old (n=4)                                                     | VL biopsy 6 h and 18 h following 10 sets x 8 repetitions of unilateral knee extension, with non-exercised contralateral control                                                                        | <ul style="list-style-type: none"> <li>• More genes regulated at 18 h versus 6 h after resistance exercise</li> <li>• Resistance exercise regulated myogenic, Interleukin-1 (IL-1), and circadian-related genes</li> </ul>                                                                                                                                                                |
| Concurrent:<br>Lundberg et al.,<br>2016 <sup>167</sup>                                 | Moderately trained young men (n=10)                                                        | VL biopsy 3 h following resistance or resistance + endurance (i.e., concurrent) exercise                                                                                                               | <ul style="list-style-type: none"> <li>• Combined endurance and resistance exercise augmented gene expression for both muscle growth and oxidative capacity</li> </ul>                                                                                                                                                                                                                    |
| <b><u>Training</u></b>                                                                 |                                                                                            |                                                                                                                                                                                                        |                                                                                                                                                                                                                                                                                                                                                                                           |
| Endurance:<br>Timmons et al.,<br>2005 <sup>168</sup>                                   | Healthy young men (n=8)                                                                    | VL biopsy pre and following 6 weeks of moderate-intensity cycle ergometer training                                                                                                                     | <ul style="list-style-type: none"> <li>• Extracellular matrix and calcium binding genes most enriched after training</li> </ul>                                                                                                                                                                                                                                                           |
| Resistance:<br>Raue et al.,<br>2012 <sup>169</sup>                                     | Healthy young women and men (n=8 per group)                                                | VL biopsy pre and following 12 weeks of progressive resistance training (also, an acute exercise bout in untrained and trained states)                                                                 | <ul style="list-style-type: none"> <li>• Modest changes to transcriptome with training</li> <li>• Acute exercise in the untrained and trained state revealed a common 'signature' of adaptation</li> </ul>                                                                                                                                                                                |
| <b><u>Biological Sex Differences</u></b>                                               |                                                                                            |                                                                                                                                                                                                        |                                                                                                                                                                                                                                                                                                                                                                                           |
| Endurance:<br>Lindholm et al.,<br>2016 <sup>170</sup>                                  | Healthy young women (n=11) and men (n=12)                                                  | VL biopsy pre and following 12 weeks of endurance knee-extensor training                                                                                                                               | <ul style="list-style-type: none"> <li>• Sex differences in the transcriptome at baseline</li> <li>• No sex-specific responses to training</li> </ul>                                                                                                                                                                                                                                     |
| Resistance:<br>Liu et al., 2010 <sup>171</sup>                                         | Healthy young women (n=8) and men (n=6) divided equally between 4 h and 24 h biopsy groups | BB biopsy 4 h and 24 h following 3 sets x 6 repetitions of several single-arm exercises, with non-exercised contralateral control. The acute bout was performed after 12 weeks of unilateral training. | <ul style="list-style-type: none"> <li>• Sex differences in the transcriptome at baseline</li> <li>• Transcriptional alterations more sustained in men 48 h after acute exercise</li> <li>• Similar pathways regulated between men and women, but downregulation of negative regulators of mTOR signalling in men and specificity for Notch and TGFβ signalling genes in women</li> </ul> |
| <b><u>Ageing</u></b>                                                                   |                                                                                            |                                                                                                                                                                                                        |                                                                                                                                                                                                                                                                                                                                                                                           |
| Endurance (HIT), resistance, and concurrent:<br>Robinson et al.,<br>2017 <sup>64</sup> | Young (n=29) and older (n=23) women and men                                                | VL biopsy pre and following 12 weeks of HIT (n=11 young and 8 older), resistance (n=10 young and 8 older), or concurrent (n=8 young and 7 older) training                                              | <ul style="list-style-type: none"> <li>• Age differences in the transcriptome at baseline</li> <li>• HIT upregulated largest number of genes in both young and older participants</li> <li>• In muscle of elderly, HIT had strongest impact on mitochondrial, muscle growth, and insulin signalling-related transcripts</li> </ul>                                                        |



|                                                     |                                                                 |                                                                                         |                                                                                                                                                                                                                      |
|-----------------------------------------------------|-----------------------------------------------------------------|-----------------------------------------------------------------------------------------|----------------------------------------------------------------------------------------------------------------------------------------------------------------------------------------------------------------------|
| Resistance:<br>Melov et al.,<br>2007 <sup>172</sup> | Healthy young<br>(n=26) and<br>older (n=14)<br>women and<br>men | VL biopsy pre and<br>following 26 weeks of<br>resistance training in the<br>older group | <ul style="list-style-type: none"> <li>• Compared to baseline, the resistance training intervention resulted in a transcriptional signature more similar to that in muscle of young sedentary individuals</li> </ul> |
|-----------------------------------------------------|-----------------------------------------------------------------|-----------------------------------------------------------------------------------------|----------------------------------------------------------------------------------------------------------------------------------------------------------------------------------------------------------------------|

---

### **Fibre Type**

|                                                    |                                            |                                                                                                              |                                                                                                                                                                                                                    |
|----------------------------------------------------|--------------------------------------------|--------------------------------------------------------------------------------------------------------------|--------------------------------------------------------------------------------------------------------------------------------------------------------------------------------------------------------------------|
| Resistance:<br>Raue et al.,<br>2012 <sup>169</sup> | Healthy young<br>and older<br>women (n=14) | VL biopsy pre and<br>following an acute<br>resistance exercise bout in<br>the untrained and trained<br>state | <ul style="list-style-type: none"> <li>• Significant response to acute resistance exercise in type IIA fibres of young, but not older women</li> <li>• Limited transcriptomic response in type I fibres</li> </ul> |
|----------------------------------------------------|--------------------------------------------|--------------------------------------------------------------------------------------------------------------|--------------------------------------------------------------------------------------------------------------------------------------------------------------------------------------------------------------------|

---

### **Meta-Analysis**

|                                       |                                                  |                                                                                                                                                                |                                                                                                                                                                                                                                                                                                                                                                      |
|---------------------------------------|--------------------------------------------------|----------------------------------------------------------------------------------------------------------------------------------------------------------------|----------------------------------------------------------------------------------------------------------------------------------------------------------------------------------------------------------------------------------------------------------------------------------------------------------------------------------------------------------------------|
| Pillon et al.,<br>2020 <sup>173</sup> | 66 studies that<br>included >1100<br>individuals | Acute and chronic<br>resistance, endurance, and<br>concurrent training studies<br>spanning different time<br>frames, biological sexes,<br>ages, and conditions | <ul style="list-style-type: none"> <li>• <i>NR4A3</i> was among the most exercise responsive genes regardless of exercise modality</li> <li>• Continually updated MetaMex online database tool (<a href="https://metamex.serve.scilifelab.se/">https://metamex.serve.scilifelab.se/</a>) for publicly available analysis of gene expression with exercise</li> </ul> |
|---------------------------------------|--------------------------------------------------|----------------------------------------------------------------------------------------------------------------------------------------------------------------|----------------------------------------------------------------------------------------------------------------------------------------------------------------------------------------------------------------------------------------------------------------------------------------------------------------------------------------------------------------------|

---

BB, biceps brachialis; VL, vastus lateralis; HIT, high-intensity interval training; mTOR, mammalian target of rapamycin; *NR4A3*, nuclear receptor subfamily 4 group A member 3 (also known as *NORI*) mRNA. TGFβ, transforming growth factor-β. All studies determined gene expression using microarray and/or RNA-sequencing.

## References

1. Schiaffino, S., Reggiani, C., Kostrominova, T.Y., Mann, M. & Murgia, M. Mitochondrial specialization revealed by single muscle fiber proteomics: focus on the Krebs cycle. *Scand J Med Sci Sports* **25 Suppl 4**, 41-48 (2015).
2. Jakobsson, F., Edstrom, L., Grimby, L. & Thornell, L.E. Disuse of anterior tibial muscle during locomotion and increased proportion of type II fibres in hemiplegia. *J Neurol Sci* **105**, 49-56 (1991).
3. Jennekens, F.G., Tomlinson, B.E. & Walton, J.N. Data on the distribution of fibre types in five human limb muscles. An autopsy study. *J Neurol Sci* **14**, 245-257 (1971).
4. Johnson, M.A., Polgar, J., Weightman, D. & Appleton, D. Data on the distribution of fibre types in thirty-six human muscles. An autopsy study. *J Neurol Sci* **18**, 111-129 (1973).
5. Henriksson-Larsen, K. Distribution, number and size of different types of fibres in whole cross-sections of female m tibialis anterior. An enzyme histochemical study. *Acta Physiol. Scand.* **123**, 229-235 (1985).
6. Green, H.J., *et al.* Human vastus lateralis and gastrocnemius muscles. A comparative histochemical and biochemical analysis. *J Neurol Sci* **52**, 201-210 (1981).
7. Allen, D.L., Harrison, B.C., Sartorius, C., Byrnes, W.C. & Leinwand, L.A. Mutation of the IIB myosin heavy chain gene results in muscle fiber loss and compensatory hypertrophy. *Am. J. Physiol. Cell Physiol.* **280**, C637-645 (2001).
8. Hamalainen, N. & Pette, D. The histochemical profiles of fast fiber types IIB, IID, and IIA in skeletal muscles of mouse, rat, and rabbit. *J. Histochem. Cytochem.* **41**, 733-743 (1993).
9. Glaser, B.W., You, G., Zhang, M. & Medler, S. Relative proportions of hybrid fibres are unaffected by 6 weeks of running exercise in mouse skeletal muscles. *Exp. Physiol.* **95**, 211-221 (2010).
10. Elashry, M.I., Otto, A., Matsakas, A., El-Morsy, S.E. & Patel, K. Morphology and myofiber composition of skeletal musculature of the forelimb in young and aged wild type and myostatin null mice. *Rejuvenation Res* **12**, 269-281 (2009).
11. Schiaffino, S. & Reggiani, C. Fiber types in mammalian skeletal muscles. *Physiol. Rev.* **91**, 1447-1531 (2011).
12. He, J., Watkins, S. & Kelley, D.E. Skeletal muscle lipid content and oxidative enzyme activity in relation to muscle fiber type in type 2 diabetes and obesity. *Diabetes* **50**, 817-823 (2001).
13. Gollnick, P.D., Armstrong, R.B., Saubert, C.W.t., Piehl, K. & Saltin, B. Enzyme activity and fiber composition in skeletal muscle of untrained and trained men. *J. Appl. Physiol.* **33**, 312-319 (1972).
14. Harridge, S.D., *et al.* Whole-muscle and single-fibre contractile properties and myosin heavy chain isoforms in humans. *Pflugers Arch.* **432**, 913-920 (1996).
15. Spangenburg, E.E. & Booth, F.W. Molecular regulation of individual skeletal muscle fibre types. *Acta Physiol. Scand.* **178**, 413-424 (2003).
16. Umek, N., Horvat, S. & Cvetko, E. Skeletal muscle and fiber type-specific intramyocellular lipid accumulation in obese mice. *Bosn. J. Basic Med. Sci.* **21**, 730-738 (2021).
17. Malenfant, P., *et al.* Fat content in individual muscle fibers of lean and obese subjects. *Int. J. Obes. Relat. Metab. Disord.* **25**, 1316-1321 (2001).

18. van Loon, L.J., *et al.* Intramyocellular lipids form an important substrate source during moderate intensity exercise in endurance-trained males in a fasted state. *J Physiol* **553**, 611-625 (2003).
19. Essen, B., Jansson, E., Henriksson, J., Taylor, A.W. & Saltin, B. Metabolic characteristics of fibre types in human skeletal muscle. *Acta Physiol. Scand.* **95**, 153-165 (1975).
20. Ingjer, F. Capillary supply and mitochondrial content of different skeletal muscle fiber types in untrained and endurance-trained men. A histochemical and ultrastructural study. *Eur. J. Appl. Physiol. Occup. Physiol.* **40**, 197-209 (1979).
21. Monster, A.W., Chan, H. & O'Connor, D. Activity patterns of human skeletal muscles: relation to muscle fiber type composition. *Science* **200**, 314-317 (1978).
22. Hennig, R. & Lomo, T. Firing patterns of motor units in normal rats. *Nature* **314**, 164-166 (1985).
23. Manuel, M., Chardon, M., Tysseling, V. & Heckman, C.J. Scaling of Motor Output, From Mouse to Humans. *Physiology (Bethesda)* **34**, 5-13 (2019).
24. Stuart, D. & Enoka, R. Motoneurons, motor units and the size principle; in Grossman. Willis. The clinical neurosciences Section V. *Neurobiology*, 471-517 (1983).
25. Glancy, B. & Balaban, R.S. Energy metabolism design of the striated muscle cell. *Physiol. Rev.* **101**, 1561-1607 (2021).
26. Abbassi-Daloui, T., *et al.* A transcriptome atlas of leg muscles from healthy human volunteers reveals molecular and cellular signatures associated with muscle location. *Elife* **12**, e80500 (2023).
27. Pellegrino, M.A., *et al.* Orthologous myosin isoforms and scaling of shortening velocity with body size in mouse, rat, rabbit and human muscles. *J Physiol* **546**, 677-689 (2003).
28. Bloemberg, D. & Quadriatero, J. Rapid determination of myosin heavy chain expression in rat, mouse, and human skeletal muscle using multicolor immunofluorescence analysis. *PLoS One* **7**, e35273 (2012).
29. Murgia, M., *et al.* Single Muscle Fiber Proteomics Reveals Fiber-Type-Specific Features of Human Muscle Aging. *Cell Rep* **19**, 2396-2409 (2017).
30. Murgia, M., *et al.* Protein profile of fiber types in human skeletal muscle: a single-fiber proteomics study. *Skelet Muscle* **11**, 24 (2021).
31. Deshmukh, A.S., *et al.* Deep muscle-proteomic analysis of freeze-dried human muscle biopsies reveals fiber type-specific adaptations to exercise training. *Nat Commun* **12**, 304 (2021).
32. Stienen, G.J., Kiers, J.L., Bottinelli, R. & Reggiani, C. Myofibrillar ATPase activity in skinned human skeletal muscle fibres: fibre type and temperature dependence. *J Physiol* **493** ( Pt 2), 299-307 (1996).
33. Luo, L., *et al.* Spatial metabolomics reveals skeletal myofiber subtypes. *Sci Adv* **9**, eadd0455 (2023).
34. Nederveen, J.P., *et al.* Skeletal muscle satellite cells are located at a closer proximity to capillaries in healthy young compared with older men. *J Cachexia Sarcopenia Muscle* **7**, 547-554 (2016).
35. Verdijk, L.B., Snijders, T., Holloway, T.M., J, V.A.N.K. & LJ, V.A.N.L. Resistance Training Increases Skeletal Muscle Capillarization in Healthy Older Men. *Med Sci Sports Exerc* **48**, 2157-2164 (2016).
36. Koh, H.E., Nielsen, J., Saltin, B., Holmberg, H.C. & Ortenblad, N. Pronounced limb and fibre type differences in subcellular lipid droplet content and distribution in elite skiers before and after exhaustive exercise. *J Physiol* **595**, 5781-5795 (2017).
37. Greenhaff, P.L., *et al.* The metabolic responses of human type I and II muscle fibres during maximal treadmill sprinting. *J Physiol* **478** ( Pt 1), 149-155 (1994).

38. Daemen, S., *et al.* Distinct lipid droplet characteristics and distribution unmask the apparent contradiction of the athlete's paradox. *Mol Metab* **17**, 71-81 (2018).
39. Dos Santos, M., *et al.* Single-nucleus RNA-seq and FISH identify coordinated transcriptional activity in mammalian myofibers. *Nat Commun* **11**, 5102 (2020).
40. Oskolkov, N., *et al.* High-throughput muscle fiber typing from RNA sequencing data. *Skelet Muscle* **12**, 16 (2022).
41. Rubenstein, A.B., *et al.* Single-cell transcriptional profiles in human skeletal muscle. *Sci. Rep.* **10**, 229 (2020).
42. D'Ercole, C., *et al.* Spatially resolved transcriptomics reveals innervation-responsive functional clusters in skeletal muscle. *Cell Rep* **41**, 111861 (2022).
43. Murgia, M., *et al.* Single muscle fiber proteomics reveals unexpected mitochondrial specialization. *EMBO Rep* **16**, 387-395 (2015).
44. Willingham, T.B., Kim, Y., Lindberg, E., Bleck, C.K.E. & Glancy, B. The unified myofibrillar matrix for force generation in muscle. *Nat Commun* **11**, 3722 (2020).
45. Ajayi, P.T., *et al.* Regulation of the evolutionarily conserved muscle myofibrillar matrix by cell type dependent and independent mechanisms. *Nat Commun* **13**, 2661 (2022).
46. Katti, P., *et al.* Mitochondrial network configuration influences sarcomere and myosin filament structure in striated muscles. *Nat Commun* **13**, 6058 (2022).
47. Phung, L.A., Foster, A.D., Miller, M.S., Lowe, D.A. & Thomas, D.D. Super-relaxed state of myosin in human skeletal muscle is fiber-type dependent. *Am. J. Physiol. Cell Physiol.* **319**, C1158-C1162 (2020).
48. Stewart, M.A., Franks-Skiba, K., Chen, S. & Cooke, R. Myosin ATP turnover rate is a mechanism involved in thermogenesis in resting skeletal muscle fibers. *Proc. Natl. Acad. Sci. U. S. A.* **107**, 430-435 (2010).
49. McNamara, J.W., Singh, R.R. & Sadayappan, S. Cardiac myosin binding protein-C phosphorylation regulates the super-relaxed state of myosin. *Proc. Natl. Acad. Sci. U. S. A.* **116**, 11731-11736 (2019).
50. Alamo, L., *et al.* Conserved Intramolecular Interactions Maintain Myosin Interacting-Heads Motifs Explaining Tarantula Muscle Super-Relaxed State Structural Basis. *J. Mol. Biol.* **428**, 1142-1164 (2016).
51. Nag, S. & Trivedi, D.V. To lie or not to lie: Super-relaxing with myosins. *Elife* **10**, e63703 (2021).
52. Dayal, A., *et al.* The Ca(2+) influx through the mammalian skeletal muscle dihydropyridine receptor is irrelevant for muscle performance. *Nat Commun* **8**, 475 (2017).
53. Linari, M., *et al.* Force generation by skeletal muscle is controlled by mechanosensing in myosin filaments. *Nature* **528**, 276-279 (2015).
54. Gong, H.M., Ma, W., Regnier, M. & Irving, T.C. Thick filament activation is different in fast- and slow-twitch skeletal muscle. *J Physiol* **600**, 5247-5266 (2022).
55. Powers, J.D., Malingen, S.A., Regnier, M. & Daniel, T.L. The Sliding Filament Theory Since Andrew Huxley: Multiscale and Multidisciplinary Muscle Research. *Annu Rev Biophys* **50**, 373-400 (2021).
56. Velez, L.M., *et al.* Genetic variation of putative myokine signaling is dominated by biological sex and sex hormones. *Elife* **11**, e76887 (2022).
57. McKellar, D.W., *et al.* Large-scale integration of single-cell transcriptomic data captures transitional progenitor states in mouse skeletal muscle regeneration. *Commun Biol* **4**, 1280 (2021).
58. Englund, D.A., *et al.* Satellite Cell Depletion Disrupts Transcriptional Coordination and Muscle Adaptation to Exercise. *Function (Oxf)* **2**, zqaa033 (2021).

59. Kaneshige, A., *et al.* Relayed signaling between mesenchymal progenitors and muscle stem cells ensures adaptive stem cell response to increased mechanical load. *Cell Stem Cell* **29**, 265-280 e266 (2022).
60. Roman, W., *et al.* Muscle repair after physiological damage relies on nuclear migration for cellular reconstruction. *Science* **374**, 355-359 (2021).
61. Englund, D.A., *et al.* Depletion of resident muscle stem cells negatively impacts running volume, physical function, and muscle fiber hypertrophy in response to lifelong physical activity. *Am. J. Physiol. Cell Physiol.* **318**, C1178-C1188 (2020).
62. Hammarstrom, D., *et al.* Ribosome accumulation during early phase resistance training in humans. *Acta Physiol. (Oxf.)* **235**, e13806 (2022).
63. Wen, Y., *et al.* Myonuclear transcriptional dynamics in response to exercise following satellite cell depletion. *iScience* **24**, 102838 (2021).
64. Robinson, M.M., *et al.* Enhanced Protein Translation Underlies Improved Metabolic and Physical Adaptations to Different Exercise Training Modes in Young and Old Humans. *Cell Metab.* **25**, 581-592 (2017).
65. Sastourne-Arrey, Q., *et al.* Adipose tissue is a source of regenerative cells that augment the repair of skeletal muscle after injury. *Nat Commun* **14**, 80 (2023).
66. Murach, K.A., *et al.* Early satellite cell communication creates a permissive environment for long-term muscle growth. *iScience* **24**, 102372 (2021).
67. Fry, C.S., Kirby, T.J., Kosmac, K., McCarthy, J.J. & Peterson, C.A. Myogenic Progenitor Cells Control Extracellular Matrix Production by Fibroblasts during Skeletal Muscle Hypertrophy. *Cell Stem Cell* **20**, 56-69 (2017).
68. Murach, K.A., *et al.* Fusion-Independent Satellite Cell Communication to Muscle Fibers During Load-Induced Hypertrophy. *Function (Oxf)* **1**, zqaa009 (2020).
69. Nakka, K., *et al.* JMJD3 activated hyaluronan synthesis drives muscle regeneration in an inflammatory environment. *Science* **377**, 666-669 (2022).
70. Ratnayake, D., *et al.* Macrophages provide a transient muscle stem cell niche via NAMPT secretion. *Nature* **591**, 281-287 (2021).
71. Long, D.E., *et al.* Skeletal muscle properties show collagen organization and immune cell content are associated with resistance exercise response heterogeneity in older persons. *J Appl Physiol (1985)* **132**, 1432-1447 (2022).
72. Dong, Y., *et al.* Branched-chain amino acids promotes the repair of exercise-induced muscle damage via enhancing macrophage polarization. *Front Physiol* **13**, 1037090 (2022).
73. Sanchez-Rodriguez, R., *et al.* OPA1 drives macrophage metabolism and functional commitment via p65 signaling. *Cell Death Differ* **30**, 742-752 (2023).
74. Lee, D.E., *et al.* Meteorin-like is an injectable peptide that can enhance regeneration in aged muscle through immune-driven fibro/adipogenic progenitor signaling. *Nat Commun* **13**, 7613 (2022).
75. Baht, G.S., *et al.* Meteorin-like facilitates skeletal muscle repair through a Stat3/IGF-1 mechanism. *Nat Metab* **2**, 278-289 (2020).
76. Peck, B.D., *et al.* A muscle cell-macrophage axis involving matrix metalloproteinase 14 facilitates extracellular matrix remodeling with mechanical loading. *FASEB J.* **36**, e22155 (2022).
77. Reddy, A., *et al.* pH-Gated Succinate Secretion Regulates Muscle Remodeling in Response to Exercise. *Cell* **183**, 62-75 e17 (2020).
78. Fan, Z., *et al.* Exercise-induced angiogenesis is dependent on metabolically primed ATF3/4(+) endothelial cells. *Cell Metab.* **33**, 1793-1807 e1799 (2021).
79. Lee, U., *et al.* A Tead1-Apelin axis directs paracrine communication from myogenic to endothelial cells in skeletal muscle. *iScience* **25**, 104589 (2022).

80. Vinel, C., *et al.* The exerkinin apelin reverses age-associated sarcopenia. *Nat. Med.* **24**, 1360-1371 (2018).
81. Rowe, G.C., *et al.* PGC-1 $\alpha$  induces SPP1 to activate macrophages and orchestrate functional angiogenesis in skeletal muscle. *Circ. Res.* **115**, 504-517 (2014).
82. Thomas, A.C.Q., *et al.* Short-term aerobic conditioning prior to resistance training augments muscle hypertrophy and satellite cell content in healthy young men and women. *FASEB J.* **36**, e22500 (2022).
83. Snijders, T., *et al.* Muscle fibre capillarization is a critical factor in muscle fibre hypertrophy during resistance exercise training in older men. *J Cachexia Sarcopenia Muscle* **8**, 267-276 (2017).
84. Nederveen, J.P., *et al.* Skeletal muscle satellite cells are located at a closer proximity to capillaries in healthy young compared with older men. *Journal of cachexia, sarcopenia and muscle* **7**, 547-554 (2016).
85. Fujimaki, S., *et al.* The endothelial Dll4–muscular Notch2 axis regulates skeletal muscle mass. *Nature Metabolism* **4**, 180-189 (2022).
86. Lovric, A., *et al.* Single-cell sequencing deconvolutes cellular responses to exercise in human skeletal muscle. *Commun Biol* **5**, 1121 (2022).
87. Sun, S., *et al.* A single-cell transcriptomic atlas of exercise-induced anti-inflammatory and geroprotective effects across the body. *Innovation (Camb)* **4**, 100380 (2023).
88. Vicente-Garcia, C., Hernandez-Camacho, J.D. & Carvajal, J.J. Regulation of myogenic gene expression. *Exp. Cell Res.* **419**, 113299 (2022).
89. Magli, A., *et al.* Pax3 cooperates with Ldb1 to direct local chromosome architecture during myogenic lineage specification. *Nat Commun* **10**, 2316 (2019).
90. Kawabe, Y., Wang, Y.X., McKinnell, I.W., Bedford, M.T. & Rudnicki, M.A. Carm1 regulates Pax7 transcriptional activity through MLL1/2 recruitment during asymmetric satellite stem cell divisions. *Cell Stem Cell* **11**, 333-345 (2012).
91. Sincennes, M.C., *et al.* Acetylation of PAX7 controls muscle stem cell self-renewal and differentiation potential in mice. *Nat Commun* **12**, 3253 (2021).
92. Kassam-Duchossoy, L., *et al.* Mrf4 determines skeletal muscle identity in Myf5:MyoD double-mutant mice. *Nature* **431**, 466-471 (2004).
93. Conerly, M.L., Yao, Z., Zhong, J.W., Groudine, M. & Tapscott, S.J. Distinct Activities of Myf5 and MyoD Indicate Separate Roles in Skeletal Muscle Lineage Specification and Differentiation. *Dev. Cell* **36**, 375-385 (2016).
94. Wang, R., *et al.* MyoD is a 3D genome structure organizer for muscle cell identity. *Nat Commun* **13**, 205 (2022).
95. Long, K., *et al.* Exploring high-resolution chromatin interaction changes and functional enhancers of myogenic marker genes during myogenic differentiation. *J Biol Chem* **298**, 102149 (2022).
96. Dos Santos, M., *et al.* A fast Myosin super enhancer dictates muscle fiber phenotype through competitive interactions with Myosin genes. *Nat Commun* **13**, 1039 (2022).
97. Long, K., *et al.* Identification of enhancers responsible for the coordinated expression of myosin heavy chain isoforms in skeletal muscle. *BMC Genomics* **23**, 519 (2022).
98. Leikina, E., *et al.* Myomaker and Myomerger Work Independently to Control Distinct Steps of Membrane Remodeling during Myoblast Fusion. *Dev. Cell* **46**, 767-780 e767 (2018).
99. van Rooij, E., *et al.* A family of microRNAs encoded by myosin genes governs myosin expression and muscle performance. *Dev. Cell* **17**, 662-673 (2009).
100. Sakakibara, I., Santolini, M., Ferry, A., Hakim, V. & Maire, P. Six homeoproteins and a linc-RNA at the fast MYH locus lock fast myofiber terminal phenotype. *PLoS Genet.* **10**, e1004386 (2014).

101. Janssen, I., Heymsfield, S.B., Wang, Z.M. & Ross, R. Skeletal muscle mass and distribution in 468 men and women aged 18-88 yr. *J Appl Physiol* (1985) **89**, 81-88 (2000).
102. Horwath, O., *et al.* Influence of sex and fiber type on the satellite cell pool in human skeletal muscle. *Scand J Med Sci Sports* **31**, 303-312 (2021).
103. Guo, Y., *et al.* Neuromuscular recruitment strategies of the vastus lateralis according to sex. *Acta Physiol. (Oxf.)* **235**, e13803 (2022).
104. Walker, S., *et al.* Acute neuromuscular and hormonal responses to 20 versus 40% velocity loss in males and females before and after 8 weeks of velocity-loss resistance training. *Exp. Physiol.* **107**, 1046-1060 (2022).
105. Binet, E.R., *et al.* Sex-based comparisons of muscle cellular adaptations after 10 weeks of progressive resistance training in middle-aged adults. *J Appl Physiol* (1985) **134**, 116-129 (2023).
106. Alcazar, J., Rodriguez-Lopez, C., Delecluse, C., Thomis, M. & Van Roie, E. Ten-year longitudinal changes in muscle power, force, and velocity in young, middle-aged, and older adults. *J Cachexia Sarcopenia Muscle* **n/a**(2023).
107. Jeon, Y., *et al.* Sex- and fiber-type-related contractile properties in human single muscle fiber. *J Exerc Rehabil* **15**, 537-545 (2019).
108. Cano, A., *et al.* Analysis of sex-based differences in energy substrate utilization during moderate-intensity aerobic exercise. *Eur J Appl Physiol* **122**, 29-70 (2022).
109. Chapman, M.A., *et al.* Skeletal Muscle Transcriptomic Comparison between Long-Term Trained and Untrained Men and Women. *Cell Rep* **31**, 107808 (2020).
110. Oosthuysen, T., Strauss, J.A. & Hackney, A.C. Understanding the female athlete: molecular mechanisms underpinning menstrual phase differences in exercise metabolism. *Eur J Appl Physiol* **123**, 423-450 (2023).
111. Willett, H.N., Koltun, K.J. & Hackney, A.C. Influence of Menstrual Cycle Estradiol-beta-17 Fluctuations on Energy Substrate Utilization-Oxidation during Aerobic, Endurance Exercise. *Int. J. Environ. Res. Public Health* **18**(2021).
112. Hackney, A.C., Koltun, K.J. & Williett, H.N. Menstrual cycle hormonal changes: estradiol-beta-17 and progesterone interactions on exercise fat oxidation. *Endocrine* **76**, 240-242 (2022).
113. Yan, H., *et al.* Estrogen Improves Insulin Sensitivity and Suppresses Gluconeogenesis via the Transcription Factor Foxo1. *Diabetes* **68**, 291-304 (2019).
114. Matsuda, T., *et al.* Influence of menstrual cycle on muscle glycogen utilization during high-intensity intermittent exercise until exhaustion in healthy women. *Appl Physiol Nutr Metab* **47**, 671-680 (2022).
115. Reis, E., Frick, U. & Schmidtbleicher, D. Frequency variations of strength training sessions triggered by the phases of the menstrual cycle. *Int J Sports Med* **16**, 545-550 (1995).
116. Wikstrom-Frisen, L., Boraxbekk, C.J. & Henriksson-Larsen, K. Effects on power, strength and lean body mass of menstrual/oral contraceptive cycle based resistance training. *J Sports Med Phys Fitness* **57**, 43-52 (2017).
117. Sung, E., *et al.* Effects of follicular versus luteal phase-based strength training in young women. *Springerplus* **3**, 668 (2014).
118. Ekenros, L., Papoutsi, Z., Friden, C., Dahlman Wright, K. & Linden Hirschberg, A. Expression of sex steroid hormone receptors in human skeletal muscle during the menstrual cycle. *Acta Physiol. (Oxf.)* **219**, 486-493 (2017).
119. Collins, B.C., *et al.* Estrogen Regulates the Satellite Cell Compartment in Females. *Cell Rep* **28**, 368-381 e366 (2019).

120. Solli, G.S., Sandbakk, S.B., Noordhof, D.A., Ihalainen, J.K. & Sandbakk, O. Changes in Self-Reported Physical Fitness, Performance, and Side Effects Across the Phases of the Menstrual Cycle Among Competitive Endurance Athletes. *Int. J. Sports Physiol. Perform.* **15**, 1-10 (2020).
121. Sung, E.S., Han, A., Hinrichs, T., Vorgerd, M. & Platen, P. Effects of oral contraceptive use on muscle strength, muscle thickness, and fiber size and composition in young women undergoing 12 weeks of strength training: a cohort study. *BMC Womens Health* **22**, 150 (2022).
122. Short, K.R., Moller, N., Bigelow, M.L., Coenen-Schimke, J. & Nair, K.S. Enhancement of muscle mitochondrial function by growth hormone. *J Clin Endocrinol Metab* **93**, 597-604 (2008).
123. Fryburg, D.A., Gelfand, R.A. & Barrett, E.J. Growth hormone acutely stimulates forearm muscle protein synthesis in normal humans. *Am J Physiol* **260**, E499-504 (1991).
124. Eliakim, A. & Nemet, D. Exercise and the GH-IGF-I Axis. in *Endocrinology of Physical Activity and Sport* (eds. Hackney, A.C. & Constantini, N.W.) 71-84 (Springer International Publishing, Cham, 2020).
125. Brandenberger, G. & Weibel, L. The 24-h growth hormone rhythm in men: sleep and circadian influences questioned. *J. Sleep Res.* **13**, 251-255 (2004).
126. van den Berg, G., Veldhuis, J.D., Frolich, M. & Roelfsema, F. An amplitude-specific divergence in the pulsatile mode of growth hormone (GH) secretion underlies the gender difference in mean GH concentrations in men and premenopausal women. *J Clin Endocrinol Metab* **81**, 2460-2467 (1996).
127. Wideman, L., Weltman, J.Y., Hartman, M.L., Veldhuis, J.D. & Weltman, A. Growth hormone release during acute and chronic aerobic and resistance exercise: recent findings. *Sports Med.* **32**, 987-1004 (2002).
128. Kraemer, W.J., Ratamess, N.A., Hymer, W.C., Nindl, B.C. & Fragala, M.S. Growth Hormone(s), Testosterone, Insulin-Like Growth Factors, and Cortisol: Roles and Integration for Cellular Development and Growth With Exercise. *Front. Endocrinol. (Lausanne)* **11**, 33 (2020).
129. Fryburg, D.A. Insulin-like growth factor I exerts growth hormone- and insulin-like actions on human muscle protein metabolism. *Am J Physiol* **267**, E331-336 (1994).
130. Steiner, J.L., *et al.* Adrenal stress hormone action in skeletal muscle during exercise training: An old dog with new tricks? *Acta Physiol. (Oxf.)* **231**, e13522 (2021).
131. Horton, T.J., Pagliassotti, M.J., Hobbs, K. & Hill, J.O. Fuel metabolism in men and women during and after long-duration exercise. *J Appl Physiol (1985)* **85**, 1823-1832 (1998).
132. Kronfol, Z., Nair, M., Zhang, Q., Hill, E.E. & Brown, M.B. Circadian immune measures in healthy volunteers: relationship to hypothalamic-pituitary-adrenal axis hormones and sympathetic neurotransmitters. *Psychosom Med* **59**, 42-50 (1997).
133. Braun, T.P. & Marks, D.L. The regulation of muscle mass by endogenous glucocorticoids. *Front Physiol* **6**, 12 (2015).
134. Sherman, B., Wysham, C. & Pfohl, B. Age-related changes in the circadian rhythm of plasma cortisol in man. *J Clin Endocrinol Metab* **61**, 439-443 (1985).
135. Van Cauter, E., Leproult, R. & Kupfer, D.J. Effects of gender and age on the levels and circadian rhythmicity of plasma cortisol. *J Clin Endocrinol Metab* **81**, 2468-2473 (1996).
136. Roelfsema, F., *et al.* Impact of age, sex and body mass index on cortisol secretion in 143 healthy adults. *Endocr Connect* **6**, 500-509 (2017).



137. Kage, A., Fenner, A., Weber, B. & Schoneshofer, M. Diurnal and ultradian variations of plasma concentrations of eleven adrenal steroid hormones in human males. *Klin. Wochenschr.* **60**, 659-666 (1982).
138. Bhake, R.C., *et al.* Continuous Free Cortisol Profiles-Circadian Rhythms in Healthy Men. *J Clin Endocrinol Metab* **104**, 5935-5947 (2019).
139. Bhake, R., *et al.* Continuous Free Cortisol Profiles in Healthy Men. *J Clin Endocrinol Metab* **105**(2020).
140. Bhake, R.C., Leendertz, J.A., Linthorst, A.C. & Lightman, S.L. Automated 24-hours sampling of subcutaneous tissue free cortisol in humans. *J Med Eng Technol* **37**, 180-184 (2013).
141. Russell, G.M., *et al.* Subcutaneous pulsatile glucocorticoid replacement therapy. *Clin. Endocrinol. (Oxf.)* **81**, 289-293 (2014).
142. Williams, J.H. & Barnes, W.S. The positive inotropic effect of epinephrine on skeletal muscle: a brief review. *Muscle Nerve* **12**, 968-975 (1989).
143. Laurent, D., Petersen, K.F., Russell, R.R., Cline, G.W. & Shulman, G.I. Effect of epinephrine on muscle glycogenolysis and insulin-stimulated muscle glycogen synthesis in humans. *Am J Physiol* **274**, E130-138 (1998).
144. Kjaer, M., Secher, N.H. & Galbo, H. Physical stress and catecholamine release. *Baillieres Clin. Endocrinol. Metab.* **1**, 279-298 (1987).
145. Prinz, P.N., Halter, J., Benedetti, C. & Raskind, M. Circadian variation of plasma catecholamines in young and old men: relation to rapid eye movement and slow wave sleep. *J Clin Endocrinol Metab* **49**, 300-304 (1979).
146. Kjær, M. & Lange, K. Adrenergic Regulation of Energy Metabolism. in *Endocrinology of Physical Activity and Sport* (eds. Hackney, A.C. & Constantini, N.W.) 153-159 (Springer International Publishing, Cham, 2020).
147. Simonides, W.S. & van Hardeveld, C. Thyroid hormone as a determinant of metabolic and contractile phenotype of skeletal muscle. *Thyroid* **18**, 205-216 (2008).
148. Russell, W., *et al.* Free triiodothyronine has a distinct circadian rhythm that is delayed but parallels thyrotropin levels. *J Clin Endocrinol Metab* **93**, 2300-2306 (2008).
149. Ylli, D., Klubo-Gwiedzinska, J. & Wartofsky, L. Exercise and Thyroid Function. in *Endocrinology of Physical Activity and Sport* (eds. Hackney, A.C. & Constantini, N.W.) 85-108 (Springer International Publishing, Cham, 2020).
150. Parra-Montes de Oca, M.A., Sotelo-Rivera, I., Gutierrez-Mata, A., Charli, J.L. & Joseph-Bravo, P. Sex Dimorphic Responses of the Hypothalamus-Pituitary-Thyroid Axis to Energy Demands and Stress. *Front. Endocrinol. (Lausanne)* **12**, 746924 (2021).
151. Caraccio, N., *et al.* Muscle metabolism and exercise tolerance in subclinical hypothyroidism: a controlled trial of levothyroxine. *J Clin Endocrinol Metab* **90**, 4057-4062 (2005).
152. Lanfranco, F. & Minetto, M.A. The Male Reproductive System, Exercise, and Training: Endocrine Adaptations. in *Endocrinology of Physical Activity and Sport* (eds. Constantini, N. & Hackney, A.C.) 121-132 (Humana Press, Totowa, NJ, 2013).
153. Sinha-Hikim, I., *et al.* Testosterone-induced increase in muscle size in healthy young men is associated with muscle fiber hypertrophy. *Am J Physiol Endocrinol Metab* **283**, E154-164 (2002).
154. Sinha-Hikim, I., Roth, S.M., Lee, M.I. & Bhasin, S. Testosterone-induced muscle hypertrophy is associated with an increase in satellite cell number in healthy, young men. *Am J Physiol Endocrinol Metab* **285**, E197-205 (2003).
155. Handelsman, D.J., Sikaris, K. & Ly, L.P. Estimating age-specific trends in circulating testosterone and sex hormone-binding globulin in males and females across the lifespan. *Ann. Clin. Biochem.* **53**, 377-384 (2016).

156. Sinha-Hikim, I., Taylor, W.E., Gonzalez-Cadavid, N.F., Zheng, W. & Bhasin, S. Androgen receptor in human skeletal muscle and cultured muscle satellite cells: up-regulation by androgen treatment. *J Clin Endocrinol Metab* **89**, 5245-5255 (2004).
157. Handelsman, D.J., Hirschberg, A.L. & Berman, S. Circulating Testosterone as the Hormonal Basis of Sex Differences in Athletic Performance. *Endocr. Rev.* **39**, 803-829 (2018).
158. Bremner, W.J., Vitiello, M.V. & Prinz, P.N. Loss of circadian rhythmicity in blood testosterone levels with aging in normal men. *J Clin Endocrinol Metab* **56**, 1278-1281 (1983).
159. Guignard, M.M., Pesquies, P.C., Serrurier, B.D., Merino, D.B. & Reinberg, A.E. Circadian rhythms in plasma levels of cortisol, dehydroepiandrosterone, delta 4-androstenedione, testosterone and dihydrotestosterone of healthy young men. *Acta Endocrinol (Copenh)* **94**, 536-545 (1980).
160. Chidi-Ogbolu, N. & Baar, K. Effect of Estrogen on Musculoskeletal Performance and Injury Risk. *Front Physiol* **9**, 1834 (2018).
161. Cooke, P.S., Nanjappa, M.K., Ko, C., Prins, G.S. & Hess, R.A. Estrogens in Male Physiology. *Physiol. Rev.* **97**, 995-1043 (2017).
162. Rahman, S.A., *et al.* Endogenous Circadian Regulation of Female Reproductive Hormones. *J Clin Endocrinol Metab* **104**, 6049-6059 (2019).
163. Horstman, A.M., Dillon, E.L., Urban, R.J. & Sheffield-Moore, M. The role of androgens and estrogens on healthy aging and longevity. *J. Gerontol. A Biol. Sci. Med. Sci.* **67**, 1140-1152 (2012).
164. Frederiksen, H., *et al.* Sex-specific Estrogen Levels and Reference Intervals from Infancy to Late Adulthood Determined by LC-MS/MS. *J Clin Endocrinol Metab* **105**, 754-768 (2020).
165. Mahoney, D.J., Parise, G., Melov, S., Safdar, A. & Tarnopolsky, M.A. Analysis of global mRNA expression in human skeletal muscle during recovery from endurance exercise. *FASEB J.* **19**, 1498-1500 (2005).
166. Zambon, A.C., *et al.* Time- and exercise-dependent gene regulation in human skeletal muscle. *Genome Biol.* **4**, R61 (2003).
167. Lundberg, T.R., Fernandez-Gonzalo, R., Tesch, P.A., Rullman, E. & Gustafsson, T. Aerobic exercise augments muscle transcriptome profile of resistance exercise. *Am J Physiol Regul Integr Comp Physiol* **310**, R1279-1287 (2016).
168. Timmons, J.A., *et al.* Human muscle gene expression responses to endurance training provide a novel perspective on Duchenne muscular dystrophy. *FASEB J.* **19**, 750-760 (2005).
169. Raue, U., *et al.* Transcriptome signature of resistance exercise adaptations: mixed muscle and fiber type specific profiles in young and old adults. *J Appl Physiol (1985)* **112**, 1625-1636 (2012).
170. Lindholm, M.E., *et al.* The Impact of Endurance Training on Human Skeletal Muscle Memory, Global Isoform Expression and Novel Transcripts. *PLoS Genet.* **12**, e1006294 (2016).
171. Liu, D., *et al.* Skeletal muscle gene expression in response to resistance exercise: sex specific regulation. *BMC Genomics* **11**, 659 (2010).
172. Melov, S., Tarnopolsky, M.A., Beckman, K., Felkey, K. & Hubbard, A. Resistance exercise reverses aging in human skeletal muscle. *PLoS One* **2**, e465 (2007).
173. Pillon, N.J., *et al.* Transcriptomic profiling of skeletal muscle adaptations to exercise and inactivity. *Nat Commun* **11**, 470 (2020).
